# Supplementary material
Source: Springer Nature journal article supplement (https://www.springermedizin.de/resource/supplementary/12936_2014_3300_MOESM2_ESM.pdf/9545574)
Supplement: MOESM2 [file 9545574]

|                                                                             |     |     |  |     |  |     |     |     |     |     |
|-----------------------------------------------------------------------------|-----|-----|--|-----|--|-----|-----|-----|-----|-----|
| Xuyi County, Jiangsu Province [26]                                          |     |     |  |     |  |     |     |     | Yes | Yes |
| Er'shilhe Village, Pingqiao District, Xingyang City, Henan Province [27-31] |     |     |  |     |  |     | Yes | Yes | Yes |     |
| Villages, Shangshui County Henan Province [32, 33]                          | Yes |     |  | Yes |  |     |     |     | Yes |     |
| Furongtian Farming construction site, Hainan Province [34]                  | Yes |     |  |     |  |     |     |     |     |     |
| Fanda Village, Lanyang County, Zhanzhou city, Hainan Province [34]          |     |     |  |     |  |     |     |     | Yes |     |
| Three villages, Jiande City, Zhejiang Province [35-38]                      | Yes |     |  |     |  |     |     |     |     |     |
| Pingdi Village, Tengchong County, Yunnan Province [39]                      | Yes |     |  |     |  |     |     |     |     |     |
| <b>Type-3 County</b>                                                        |     |     |  |     |  |     |     |     |     |     |
| Kejian Village, Jian'ou County Fujian Province [40, 41]                     | Yes |     |  |     |  | Yes |     |     |     |     |
| Liufang Village, Longjuan Township, An'xi County, Fujian Province [42, 43]  | Yes |     |  |     |  |     |     |     |     |     |
| Pu'er County, Yunnan Province [44]                                          | Yes | Yes |  |     |  |     |     |     |     |     |
| Two villages, Qinshi Town Changshan County, Zhejiang Province [45]          | Yes |     |  |     |  |     |     |     |     |     |
| Honghe Town, Jiaxing City, Zhejiang Province [46]                           | Yes |     |  |     |  |     |     |     |     |     |

†based on malaria country reports of the years 2006-2008 from Action Plan of China Malaria Elimination [2010-2020]. Type I: local infections detected in three consecutive years and annual incidences  $\geq 1/10,000$ ; Type II: local infections detected in three consecutive years and at least in one year the annual incidence  $< 1/10,000$  and  $> 0$ ; Type III: no local infections reported in the last three years;

## Bibliography

1. Che LG, Li XL, Yang YM, Li CF, Zhang YL: **A survey on malaria outbreak in Jiabutuo Reclamation Area, YunNan Province [in Chinese]**. *Chinese Journal of Parasitic Disease Control* 1992, **5**:81-83.

2. He YJ, Huang RJ, Ji WQ, Liu S: **Investigation of a vivax malaria outbreak in XinXiangMiao Village [in Chinese]**. *HaiNan Medical Journal* 1993, **4**:3-4.
3. Wang JZ: **A vivax malaria outbreak in a mine field in HaiNan Province [in Chinese]**. *People's Military Surgeon* 1995:11-12.
4. Duan JS, Zhang YB, Liang HJ, Chen GY, Zhu MF: **Control of a vivax malaria outbreak in QiongZhong County [in Chinese]**. *Chinese Journal of Parasitology and Parasitic Diseases* 1999, **17**:270.
5. M.H. L, Wu KC, Chen WJ: **A review and analysis of focus outbreak of malaria in areas with Anopheles mimus as vector in Hainan Island**. *China Tropical Medicine* 2009, **9**:805-806.
6. Zhu QX: **Analysis of a sporadic outbreak in mobile population in mountainous area of HaiNan Province [in Chinese]**. *China Tropical Medicine* 2002, **2**:239-241.
7. Sun XD, Huang GZ, Zhang ZX, Liu H: **Investigation of malaria outbreak in rubber farming development zone in GuangLei Harbor, Mengla County [in Chinese]**. *Journal of Practical Parasitic Diseases* 2011, **9**:111-112.
8. Zuo SL, Chen GY, Huang GQ, Gui AF, Pei SJ, HU LQ, Chen CY, Yang DL, zhang WJ, Y.H. Y: **Analysis of the Factors Causing Malaria Local Outbreak in Anopheles Sinensis Area, Zaoyang City, Hubei Province [in Chinese]**. *Gonggong Weisheng Yu Yufang Yixue* 2002, **13**:6-7.
9. Yang J, Fang XL, Lin YX, Zou J: **Survey and management of a sporadic outbreak of malaria in village on the Myanmar-China border [in Chinese]**. *China Tropical Medicine* 2005, **5**:477.
10. Chen JF, LV CQ, Luo PZ, Luo QM: **Survey and treatment of a sporadic outbreak of falciparum malaria in a low endemic areas of Sanya City [in Chinese]**. *China Tropical Medicine* 2004, **4**:978-979.
11. Sheng HF, Zhen X, Shi WQ, Xu JJ, Jiang WK, Wang DQ, Tang LH: **Factors Affecting Malaria Outbreak in Congjiang County of Guizhou Province**. *Chinese Journal of Parasitic Disease Control* 2007, **25**:225-229.
12. N.B. W, Long QQ, Luo T, Wang SH, Zhou J, Tang DL, Deng MM, li SP: **Analysis of the outbreak reasons of malaria for 2 years in JuDong Village of CongJiang County in GuiZhou [in Chinese]**. *Modern Preventive Medicine* 2008, **35**:3629-3631.
13. Zhang HW, Su YP, Zhou GC, Liu Y, Cui J, Wang ZQ: **Re-emerging malaria in YongCheng city of HeNan Province [in Chinese]**. *Chin J Vector Bio & Control* 2007, **18**:42-44.
14. Zhou GC, Zhang HW, Su YP, Zhou SS: **Epidemiologic Analysis of Malaria Outbreak in Yongcheng County of Henan Province in 2006 [in Chinese]**. *Journal of tropical medicine* 2008, **8**:381-383.
15. Pan JY, Zhou SS, Zheng X, Huang F, Wang DQ, Shen YZ, Su YP, Zhou GC, Liu F, Jiang JJ: **Vector capacity of Anopheles sinensis in malaria outbreak areas of central China**. *Parasites & vectors* 2012, **5**:136.
16. Liu ZL: **Evaluation of management of malaria outbreak in DengZhou City of HeNan Province [in Chinese]**. *Chinese And Foreign Medical Research* 2012, **10**:80-81.
17. Pu LQ, Hong WX, Zeng KT: **Investigation on one endogenous malaria outbreak situation around the border region in the Yunnan Province [in Chinese]**. *Journal of Pathogen Biology* 2009, **4**:479-480.
18. Zhang ZX, Zhou HN, Zhao XT, Chang FX, Wang HJ, Li XJ, Zhuoma YJ, Ciren QZ, Bianma ZM, Sangdan LM, et al: **Epidemiological Survey on Malaria Situation in Motuo County of Tibet China**. *Chinese Journal of Parasitic Disease Control* 2008, **26**:343-348.
19. ZhuoMa YJ, Wang HJ, CiRen WM, Wu S, Xu GJ, Zhang R, Hu SL, Xu HM: **Investigation of a malaria outbreak in Motuo County, Tibet Autonomous Region [in Chinese]**. *Int J Med Parasit dis* 2011, **38**:270-272.
20. Yang YY: **An investigation of local Plasmodium vivax malaria outbreak [in Chinese]**. *Anhui Journal of Preventive Medicine* 1997, **3**:71.
21. Zhang BR, Chen ZS, Li YF, Zhou XY, Chen YZ, Meng GR, Yang SQ, Zhang CB, Li XC, Tang RH: **An Investigation of imported malaria outbreak [in Chinese]**. *Chinese Journal of Parasitology & Parasitic Diseases* 1995, **13**:12.
22. Dai Q, Guo HP, Ou GR, Yang XB: **A report of falciparum malaria outbreak in a Mid-Levels District [in Chinese]**. *Disease Surveillance* 1994, **9**:15-16.
23. Lin YJ: **An Investigatio of two malaria outbreaks in NaPo County [in Chinese]**. *GuangXi Preventive Medicine* 1997, **3**:220-221.

24. Si YZ, Pang XJ, Cai HL, Lin CF, Liang ZT, Kong XQ, Su AF, Fu JC, Chen SD: **An Analysis of a local malaria outbreak in Mining factory in Changliu of HaiKou City [in Chinese].** *HaiNan Medical Journal* 1995, **6**:1-2.
25. Che LG, Yang CJ, Zhang YL, Li XL: **Investigation of malaria outbreaks in JingHong City [in Chinese].** *Journal of Practical Parasitic Diseases* 1996, **4**:86.
26. Zhao LY, Gao Q, Fan JH, Yuan SG: **An Investigation of local malaria outbreak in XuYi County [in Chinese].** *Chinese Journal of Schistosomiasis Control* 1999, **11**:56-57.
27. Shang LY, Chen JS, Liu H, A.M. L, Su YJ, Gu ZC, Luo MZ, ZHEN X: **Investigation on anthropophilic index of anopheles in the outbreak site of malaria.** *Chinese Journal of Parasitic Disease Control* 2000, **13**:257.
28. Shang LY, Chen JS, Gu ZC, Zhen X, Liu H, Su YJ, A.M. L, Luo MZ, Qian HL, Tang LH: **Investigation on malaria outbreak in area of the disease basically eliminated in HeNan Province [in Chinese].** *Chinese Journal of Parasitic Disease Control* 2001, **14**:81-83.
29. Yang ZY, Wu XT, Bai Q, Dai XJ: **Surveillance on malaria in Pingqiao District of Xinyang City [in Chinese].** *Chinese Journal of Parasitic Disease Control* 2003, **16**:361.
30. Xu BL, Su YP, Shang LY, Zhang HW: **Malaria control in Henan Province, People's Republic of China.** *The American journal of tropical medicine and hygiene* 2006, **74**:564-567.
31. Sleigh AC, Liu XL, Jackson S, Li P, Shang LY: **Resurgence of vivax malaria in Henan Province, China.** *Bulletin of the World Health Organization* 1998, **76**:265-270.
32. Chen JS, Li P, Shang LY, Li XH, Zhao JH: **Investigation of epidemiological factors in a malaria outbreak in Shangshui County, HeNan Province [in Chinese].** *HeNan Journal of Preventitive Medicine* 2004, **15**:153-155.
33. Hao JL, Wu WM, Dou CY: **Investigation and control of malaria outbreaks in 2001-2003 in Shangshui county [in Chinese].** *Chinese journal of parasitology & parasitic diseases* 2004, **22**:333.
34. Yang JL, Lin JS, Chen GZ: **A report of management of two malaria outbreaks [in Chinese].** *Chinese Journal of Epidemiology* 2003, **24**:927.
35. Jin XY, Xu WM, Shi SF, Zhu SJ, Wang H, Yang Y, Xu XP, Zhu TP: **Control and investigation of a local malaria outbreak [in Chinese].** *Chinese Journal of Health Laboratory Technology* 2007, **17**:1507-1508.
36. Xu XP, Zhu TP, Wang WQ: **Investigation of malaria outbreak in SanDu Township, Jiande City [in Chinese].** *ZheJiang Preventive Medicine* 2007, **19**:34.
37. Xu XP, Wang WQ, Zhu TP: **Analysis of malaria epidemic situation and trend in Jiande from 2004 to 2007.** *Journal of Pathogen Biology* 2008, **3**:2-3.
38. Zhu TP, X.P S, Wang WQ, Wang J: **Epidemiologic analysis of epidemic situation in two malaria outbreak spots.** *Chinese Rural Health Service Administration* 2009, **29**:843-844.
39. Duan YZ, Li SG, Kang XH, Yin SQ, Sun XD: **A point-like outbreak caused by secondary transmission from an imported malaria vivax case [in Chinese].** *Int J Med Parasit Dis* 2013, **40**:57-59.
40. He RB, Wu HF, Wu JY, Xu CS: **Epidemiological factors and prevention strategy of vivax malaria outbreak in pre-elimination stage [in Chinese].** *Chinese Journal of Parasitic Disease Control* 1996, **14**:158-159.
41. Xu BH, Zhen ZJ, Liu QS, He XH, Wu JJ, Huang BF, Wu JY, He RB, Li LS, Deng YQ: **Investigation on epidemiological factors in vivax malaria outbreak area with An. Sinensis [in Chinese].** *Chinese Journal of Parasitic Disease Control* 1994, **7**:297-298.
42. Wang ZS, Li GQ, Cai BG: **Investigation of a local malaria outbreak in Anxi County of Fujian Province** *Chinese Journal of Parasitology and Parasitic Diseases* 1998, **16**:156.
43. Liao YH: **Malaria epidemiology overview of AnXi County, Fujian Province between 1950-1997 [in Chinese].** *Chinese Journal of Parasitic Disease Control* 2000, **18**:32.
44. Zhou DC: **Malaria outbreak in 3 coffee plantation farm in Puer County [in Chinese].** *Journal of Practical Parasitic Disease* 2001, **9**:144.
45. Xu QH, Dai JE, Shou SL: **Investigation on an imported vivax malaria outbreak.** *ZheJiang Preventive Medicine* 2006, **18**:26.
46. Yao LN, Xu X, Xia SR, Chen HL, Yang TT, Ruan W, Yao SR, Yu KG: **Evaluation on the effect of ongoing surveillance of malaria outbreak focus.** *Zhejiang Preventive Medicine* 2011, **23**:19-22.
